# MIND TO MIND

Creative writing that explores the abstract side of our profession and our lives

## Treading Through Twilight

Brian R. Smith, M.S.

### 1. Analgesia

Twilight's gentle touch  
Pain retreats as shadows grow  
Blossoms in the dusk.  
Caressed by the evening breeze,  
I find solace in the calm.

### 2. Delirium

Clouds amass above.  
Lost within a moonless night,  
Breath a fickle wind.  
Stumbling on my path, adrift,  
Windswept thoughts like fallen leaves.

### 3. Surgical Anesthesia

Moonlight's soft ballet:  
The dancer surrenders, still.  
River's calm embrace.  
Limbs and will in harmony,  
Airways' fragile trust secured.

### 4. Medullary Depression

Treading through twilight –  
In the arms of dusk, I rest,  
Heart and breath as one.  
Sun sets on the horizon  
At the precipice of night.

Accepted for publication June 16, 2023. Published online first on August 23, 2023.

Brian R. Smith, M.S.: Department of Anesthesiology, Perioperative and Pain Medicine, Stanford University School of Medicine, Stanford, California. bsmith19@stanford.edu

Permission to reprint granted to the American Society of Anesthesiologists by copyright author/owner. ANESTHESIOLOGY 2024; 140:329. DOI: 10.1097/ALN.0000000000004661
